# Supplementary material for: A 3D heterometallic Ni(ii)/K(i) MOF with a rare rna topology: synthesis, structural features, and photocatalytic dye degradation modeling
Source: Royal Society of Chemistry journal article supplement (doi:10.1039/c9nj04382a), 2019-01-01
Supplement: c9nj04382a1.pdf [file c9nj04382a1.pdf]

*Electronic Supplementary Information (ESI)*

**3D heterometallic Ni(II)/K(I) MOF with a rare rna topology: synthesis, structural features, and photocatalytic dye degradation modeling<sup>†</sup>**

Marjan Abedi<sup>a</sup>, Ghodrat Mahmoudi<sup>b\*</sup>, Payam Hayati<sup>c\*</sup>, Barbara Machura<sup>d</sup>, Fedor I. Zubkov,<sup>e</sup> Khosro Mohammadi<sup>c</sup>, Shima Bahrami<sup>f</sup>, Hadis Derikvandi<sup>g</sup>, Zohreh Mehrabadi<sup>h</sup> and Alexander M. Kirillov<sup>i,e\*</sup>

<sup>a</sup>Department of Chemistry, Faculty of Science, University of Mohaghegh Ardabili, P.O. Box 56199-11367, Ardabil, Iran

<sup>b</sup>Department of Chemistry, Faculty of Science, University of Maragheh, P.O. Box 55181-83111, Maragheh, Iran; E-mail: ghodratmahmoudi@gmail.com

<sup>c</sup>Department of Chemistry, Faculty of Sciences, Persian Gulf University, Bushehr 75169, Iran; E-mail: payamhayati@yahoo.com

<sup>d</sup>Department of Crystallography, Institute of Chemistry, University of Silesia, 9th Szkolna St 40-006 Katowice, Poland

<sup>e</sup>Peoples' Friendship University of Russia (RUDN University), Miklukho-Maklaya str. 6, 117198 Moscow, Russian Federation

<sup>f</sup>Department of Environmental Health, School of Health, Shiraz University of Medical Science, Shiraz, Iran

<sup>g</sup>Department of Clean Technologies, Chemistry and Chemical Engineering Research Center of Iran, P. O. Box 14335-186, Tehran, Iran

<sup>h</sup>Department of Chemistry, Firoozabad Branch, Islamic Azad University, Firoozabad, Iran

<sup>i</sup>Centro de Química Estrutural, Complexo I, Instituto Superior Técnico, Universidade de Lisboa, Av. Rovisco Pais, 1049-001, Lisbon, Portugal; E-mail: kirillov@tecnico.ulisboa.pt

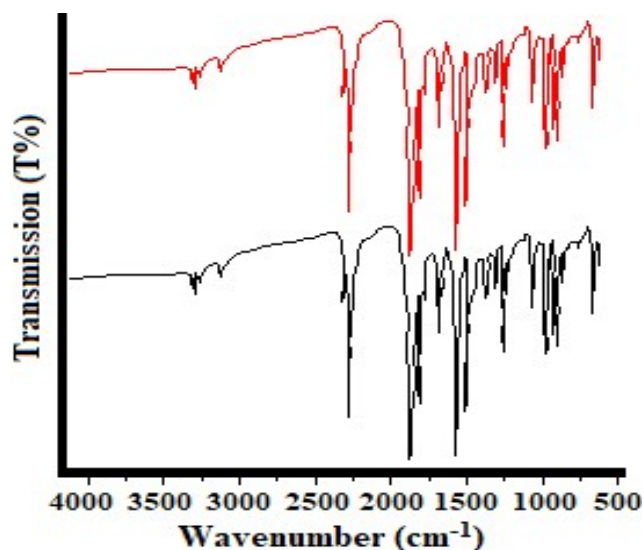

**Figure S1.** IR spectra of **1** (top: as synthesized microcrystals) and **1s** (bottom: sonochemically prepared sample).

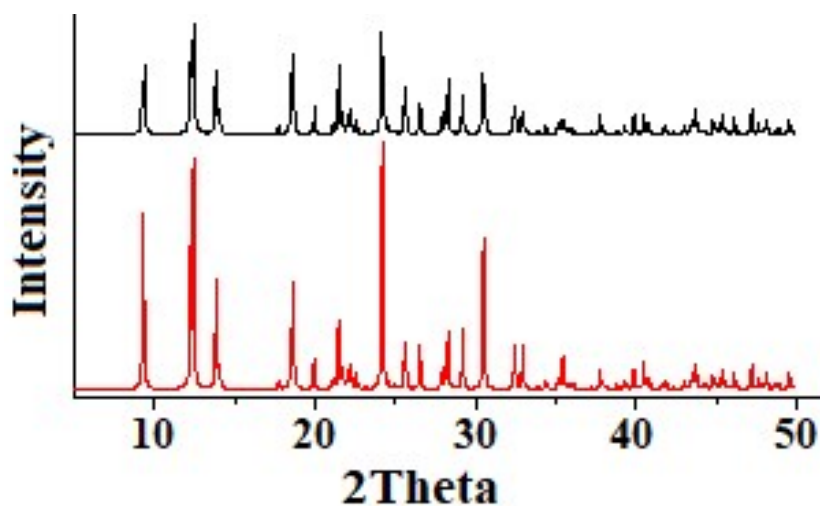

**Figure S2.** PXRD patterns: compound **1s** (top: sonochemical synthesis), simulated from single crystal X-ray data of **1** (bottom).

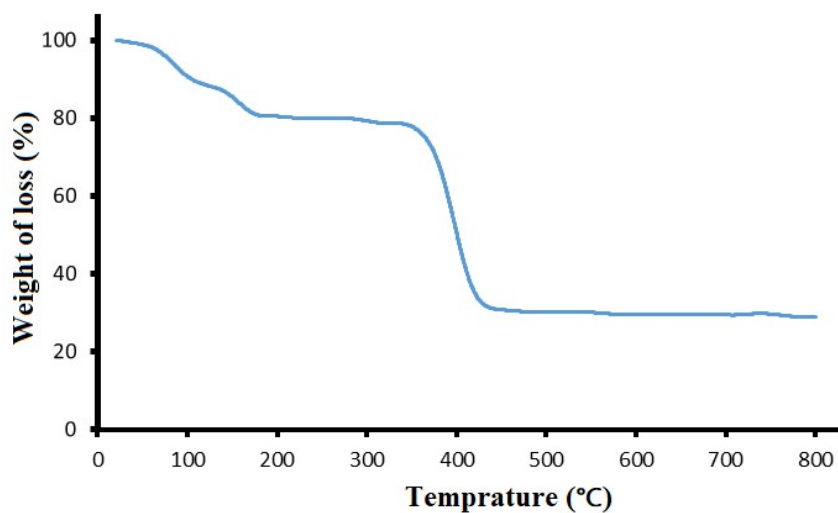

**Figure S3.** TGA of **1s** (sample of entry 5, Table 3).

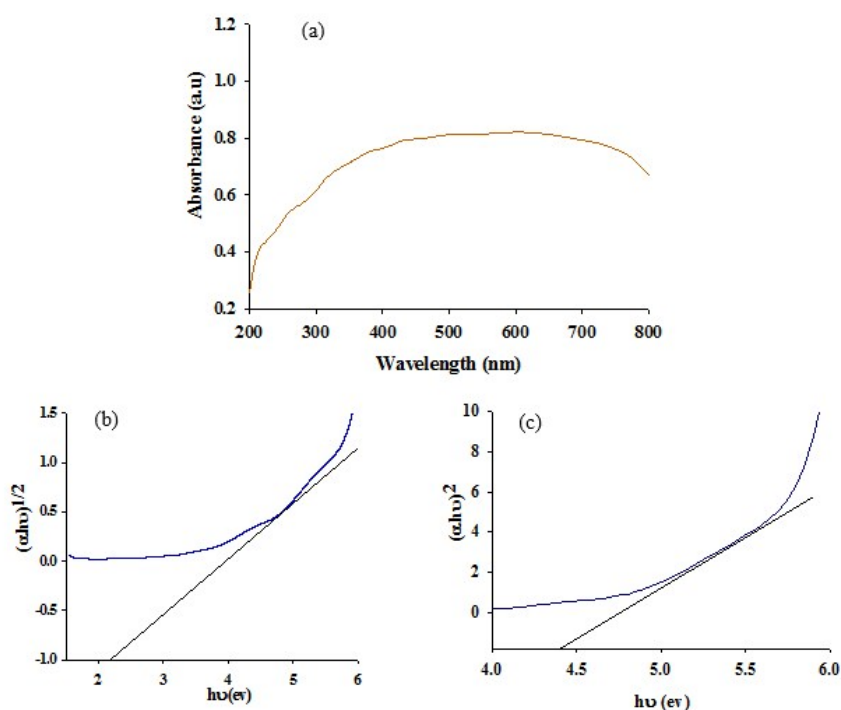

**Figure S4.** (a) UV-Vis DRS of **1s**. (b,c) Typical Tauc plots for allowed direct (b) and indirect (c) transitions in **1s**.

**Table S1.** Central composite design with predictive values and their experimental results in photocatalytic experiments.

| Trial no. | Factor level   |                |                |                | Response: Deg. (%) |           |
|-----------|----------------|----------------|----------------|----------------|--------------------|-----------|
|           | X <sub>1</sub> | X <sub>2</sub> | X <sub>3</sub> | X <sub>4</sub> | Observed           | Predicted |
| 1         | 0              | 0              | 0              | +2             | 87.8               | 85.7      |
| 2         | -1             | +1             | +1             | -1             | 70.3               | 69.6      |
| 3         | 0              | 0              | 0              | 0              | 94.5               | 93.5      |
| 4         | -1             | +1             | -1             | -1             | 70.3               | 71.5      |
| 5         | -1             | +1             | +1             | +1             | 71.1               | 70.3      |
| 6         | +1             | -1             | -1             | -1             | 79.6               | 79.2      |
| 7         | +1             | -1             | -1             | +1             | 84.0               | 82.8      |
| 8         | +1             | +1             | +1             | -1             | 79.3               | 79.6      |
| 9         | +1             | +1             | -1             | +1             | 88.4               | 87.2      |
| 10        | +2             | 0              | 0              | 0              | 94.3               | 92.8      |
| 11        | 0              | 0              | -1             | 0              | 95.6               | 93.5      |
| 12        | 0              | 0              | +1             | -2             | 80.6               | 80.7      |
| 13        | 0              | 0              | -1             | 0              | 91.0               | 93.4      |
| 14        | -1             | +1             | -1             | +1             | 70.7               | 72.9      |
| 15        | -1             | -1             | +1             | -1             | 64.7               | 65.8      |
| 16        | +1             | -1             | 0              | -1             | 75.9               | 76.6      |
| 17        | 0              | 0              | +1             | 0              | 94.9               | 93.5      |
| 18        | -1             | +1             | +1             | -1             | 85.5               | 84.0      |

|    |    |    |    |    |       |      |
|----|----|----|----|----|-------|------|
| 19 | 0  | 0  | 0  | 0  | 80.9  | 80.0 |
| 20 | +1 | 0  | -1 | -1 | 97.9  | 98.6 |
| 21 | 0  | +1 | 0  | 0  | 81.0  | 80.0 |
| 22 | 0  | 0  | -2 | 0  | 92.2  | 93.5 |
| 23 | +1 | +1 | 0  | +1 | 100.0 | 97.8 |
| 24 | 0  | -2 | 0  | 0  | 70.6  | 70.3 |
| 25 | -1 | -1 | 0  | +1 | 83.0  | 82.3 |
| 26 | +1 | -1 | 0  | +1 | 78.5  | 81.0 |
| 27 | -1 | -1 | 0  | +1 | 61.7  | 63.3 |
| 28 | -2 | 0  | +2 | 0  | 65.4  | 65.1 |
| 29 | 0  | 0  | 0  | 0  | 92.5  | 93.4 |
| 30 | 0  | +2 | 0  | 0  | 80.0  | 80.4 |

**Table S2.** Comparison of different photocatalysts for BCG degradation.

| Catalyst                              | Initial Concentration (BCG) | Irradiation Time (min) | % Degradation Efficiency (%) | Ref.      |
|---------------------------------------|-----------------------------|------------------------|------------------------------|-----------|
| Ni(II)/K(I) MOF                       | 6.0 mg/L                    | 46                     | 94                           | This work |
| Ti/SnO <sub>2</sub> -RuO <sub>2</sub> | 100 mg/L                    | 150                    | 91                           | [50]      |
| Fe(III)/H <sub>2</sub> O <sub>2</sub> | 6×10 <sup>-5</sup> M        | 70                     | 74                           | [51]      |
| PTA/ZR13                              | 1×10 <sup>-5</sup> M        | 20                     | 73                           | [52]      |
| ZnO                                   | 1×10 <sup>-5</sup> M        | 75                     | 64                           | [53]      |
| WO <sub>3</sub> /ZnO                  | 1×10 <sup>-5</sup> M        | 75                     | 60                           | [53]      |
| CuS-Cp                                | 10.0 mg/L                   | 480                    | 60                           | [54]      |
| ZnO-Cp                                | 10.0 mg/L                   | 480                    | 56                           | [54]      |
